# Supplementary material for: miR-200a-3p overexpression alleviates diabetic cardiomyopathy injury in mice by regulating autophagy through the FOXO3/Mst1/Sirt3/AMPK axis
Source: PeerJ. 2023 Sep 15;11:e15840. doi: 10.7717/peerj.15840 (PMC10506579; doi:10.7717/peerj.15840)
Supplement: Supplemental Information 1 [file peerj-11-15840-s001.xlsx]

## Sheet: Sheet 1
						Control	DCM	DCM+rAAV-SC	DCM+rAAV-miR-200a-3p
			Relative expression of miR-200a-3p			Mean	Mean	Mean	Mean
						0.91	0.3	0.3	1.05
						0.99	0.35	0.27	0.99
						1.03	0.28	0.24	0.86
						1.03	0.31	0.3	1.01
						0.98	0.35	0.32	0.93
						0.78	0.3	0.25	0.87
						1.02	0.32	0.32	1.06
						1.13	0.32	0.39	0.82
						1.04	0.34	0.24	0.88
						0.98	0.27	0.22	0.87
			LVEF (%)			70.87	46.86	47.06	39.79
						54.76	36.95	39.33	63.11
						71.88	48.28	46.76	55.41
						68	50.39	48.45	54.24
						62.17	35.02	41.59	54.92
						67.91	34.21	41.35	59.73
						61.42	46.67	46.13	57.9
						59.58	48.01	45.02	54.19
						63.45	44.54	46.92	49.97
						77.1	41.72	48.93	59.89
			LVFS (%)			39.08	23.21	24.22	23.23
						30.46	19.74	25.26	35.08
						34.34	16.53	25.43	33.99
						45.87	11.12	19.56	19.98
						38.61	15.34	18.85	21.56
						40.92	31.28	19.64	34.3
						35.91	12.98	16.53	37.91
						36.56	24.19	10.33	19.53
						28	22.7	17.75	33.44
						40.4	14.36	35.98	31.63
			LVEDD (mm)			3.18	4.67	4.5	2.82
						3.32	4.55	4.6	4.42
						3.49	4.67	4.29	2.77
						3.52	4.57	4.55	3.39
						3.49	3.85	4.65	3.65
						3.62	4.59	4.86	3.81
						3.48	4.78	4.33	4.24
						2.88	4.76	4.88	2.87
						3.12	5	4.37	3.22
						3.35	5.21	4.43	3.46
			LVESD (mm)			2.48	3.37	2.91	2.68
						2.21	3.43	3.13	2.82
						2.42	3.9	3.79	2.74
						2.47	3.5	3.1	2.37
						2.57	3.37	3.55	2.54
						2.42	3.39	3.49	2.69
						2.15	3.14	3.29	2.48
						2.65	3	3.19	2.86
						2.63	3.47	3.09	2.61
						2.24	3.09	3.4	2.35

## Sheet: Sheet2
							Control	DCM	DCM+rAAV-SC	DCM+rAAV-miR-200a-3p
							Mean	Mean	Mean	Mean
				Activity of CK (U/L)			632.18	1997.21	2138.84	1175.63
							956.36	1927.51	2251.71	1368.47
							695.42	2015.41	1989.36	1073.82
							798.52	2030.68	1912.49	1177.45
							844.81	2049.12	2010.61	1065.58
							631.38	2096.22	1970.68	1122.06
							764	1900.12	1838.7	1297.92
							740.81	2080.25	2099.18	1294.24
							491.91	1897.17	1907.92	1367.16
							1079.61	1831.32	2045.52	1312.67
				Activity of CK-MB (U/L)			75.05	185.75	177.53	95.15
							70.86	195.43	185.3	52.01
							60.82	187.35	222.07	72.4
							50.76	169.79	175.17	107.16
							50.46	173.75	183.62	93.19
							62.1	180.29	194.58	119.49
							59.95	196.02	173.94	70.84
							81.93	176.68	212.26	56.56
							77.34	176.01	163.17	96.82
							85.72	183.94	177.37	81.39
				Activity of LDH (U/L)			305.74	1112.77	1157.71	363.25
							357.98	1028.79	1073.79	377.03
							305.93	1157.88	1077.72	375
							298.29	1084.85	1030.05	321.2
							344.29	1079.26	1074.86	409.85
							329.1	1118.03	1189.04	374.14
							305.15	1082.45	1078.75	446.13
							313.44	983.88	1126.13	370.92
							344.42	1047.77	1181.34	365.34
							294.5	1096.96	1085.6	342.15

## Sheet: Sheet3
							Control	DCM	DCM+rAAV-SC	DCM+rAAV-miR-200a-3p
							Mean	Mean	Mean	Mean
				concentration of IL-1β			68.38	110.96	104.9	63.17
							54.1	101.43	117.45	73.41
							53.55	89.51	89.73	64.88
							67.7	101.14	105.14	62.9
							60.86	100.14	117.58	72.37
							63.24	102.9	113.64	65.22
							32.96	112.72	79.27	74.6
							49.82	116.09	86.15	73.85
							79.93	116.57	87.15	66.03
							44.47	114.03	113.99	78.08
				concentration of IL-6			29.51	91.91	79.58	74.8
							40.94	93.89	50.66	42.58
							28.22	61.64	91.52	39.75
							29.59	66.89	76.64	37.49
							25.8	70.39	76.03	61.86
							15.51	94.3	43.74	56.66
							15.02	105.22	81.92	62.44
							23.08	85.14	101.71	49.72
							35.33	74.84	87.2	45.96
							42	70.77	76	53.75
				concentration of TNF-α			56.37	347.66	289.91	162.34
							54.19	361.75	314.37	191.81
							56.04	299.44	287.71	169.17
							104.9	300.6	372.93	151.39
							80.08	357.98	334.79	187.51
							87.5	351.05	362.9	195.29
							80.22	346.31	333.43	177.83
							75.13	314.54	354.42	164.67
							58.91	284.76	373.54	211.68
							71.66	350.91	390.99	153.31
				concentration of ICAM-1			73.86	269.78	269.47	116.96
							61.39	313.61	280.26	119.45
							94.75	306.72	265.61	127.11
							105.25	307.06	291.16	125.82
							92.08	274.6	298.08	120.48
							116.11	310.42	288.59	136.74
							74.66	264.94	305.13	120.02
							98.99	337.86	308.86	132.06
							87.05	260.82	277.36	149.19
							100.37	279.19	280.49	141.66

## Sheet: Sheet4
							Control	DCM	DCM+rAAV-SC	DCM+rAAV-miR-200a-3p
				Relative expression of LC3-II/I			Mean	Mean	Mean	Mean
							1.07	0.57	0.39	0.79
							0.87	0.37	0.36	0.9
							1.09	0.44	0.35	0.91
							1	0.36	0.41	0.8
							0.92	0.42	0.33	0.88
							1.09	0.39	0.24	0.94
							1	0.46	0.61	0.92
							1.08	0.36	0.19	0.93
							1.06	0.35	0.59	0.91
							0.84	0.49	0.43	0.96
				Relative expression of Beclin 1			1.17	0.52	0.62	1.01
							1.09	0.56	0.5	1
							1.03	0.58	0.65	0.99
							0.99	0.57	0.42	0.9
							1.02	0.51	0.52	0.99
							0.96	0.44	0.62	0.82
							1.09	0.37	0.46	1.04
							0.89	0.52	0.44	0.77
							1.16	0.5	0.49	1
							1.09	0.57	0.53	1.13
				Relative expression of caspase-3			0.87	3.07	2.86	1.21
							1.15	2.87	3.12	0.67
							0.9	2.94	3.22	1.17
							0.86	2.87	2.73	0.85
							1.11	3.19	2.65	1.09
							0.94	2.87	3.12	1.31
							0.92	2.87	2.66	1.25
							0.96	2.75	2.72	1.1
							0.97	2.81	3.04	1.29
							0.98	2.5	3.03	1.32
				Tunel positive cells (%)			4.5	4.5	33.91	11.47
							5.52	5.52	33.57	4.5
							6.69	6.69	32.5	7.55
							6.47	6.47	29.13	10.69
							5.54	5.54	30.4	12.24
							2.33	2.33	32.7	11.01
							6.31	6.31	32.5	8.39
							8.56	8.56	32.77	9.2
							7.01	7.01	36.08	9.81
							5.52	5.52	30.95	11.64

## Sheet: Sheet5
							Control	DCM	DCM+rAAV-SC	DCM+rAAV-miR-200a-3p
				Relative expression of p-FOXO3/FOXO3			Mean	Mean	Mean	Mean
							1.11	3.05	3.3	0.89
							1	2.99	3.2	0.93
							1.11	3.07	3.61	1.34
							1.21	3.01	2.93	1.13
							1	2.87	2.96	1.2
							0.65	3.36	3.24	0.91
							0.98	3.35	3.28	1.1
							0.78	3.38	2.89	0.94
							0.9	3.27	2.96	1.18
							1	3.31	3.13	0.93
				Relative expression of MST1			1.2	3.33	3.58	1.5
							0.94	3.92	3.61	1.3
							0.91	3.66	3.37	1.05
							1	3.32	3.5	1.39
							1.08	3.32	3.57	1.08
							1.09	3.24	3.52	1.09
							0.89	3.11	3.51	1.12
							0.98	3.16	3.63	1.18
							0.93	3.75	3.66	1.15
							0.74	3.65	3.21	0.9
				Relative expression of Sirt3			0.87	0.36	0.34	0.89
							0.96	0.43	0.36	0.93
							1.05	0.34	0.44	0.98
							1.01	0.32	0.48	0.93
							1.04	0.47	0.41	0.97
							0.93	0.27	0.48	0.99
							0.99	0.53	0.4	0.93
							1.09	0.36	0.4	0.88
							1.05	0.41	0.37	0.88
							1	0.36	0.47	0.97
				Relative expression of p-AMPK/AMPK			1.07	0.39	0.35	0.76
							1.11	0.4	0.41	0.69
							0.9	0.38	0.35	0.96
							0.95	0.44	0.24	0.68
							0.99	0.37	0.39	1.01
							0.89	0.36	0.42	0.97
							0.84	0.33	0.26	0.93
							1	0.3	0.22	0.98
							0.96	0.35	0.37	0.88
							0.8	0.23	0.33	0.89
								NC mimic	miR-200a-3p mimic
				Relative luciferase activity			FOXO3-MT	0.93	0.42
								0.95	0.37
								1.07	0.51
								0.88	0.48
								0.91	0.3
							FOXO3-MUT	0.92	0.96
								0.71	0.86
								0.99	0.89
								0.99	1.06
								1	1.05
